# Supplementary material
Source: Research Square preprint supplement (doi:10.21203/rs.3.rs-9759894/v1)
Supplement: Supplementary file 1 [file 98e0ed541ac6e2fbeed271ff.docx]

**Appendix A. Survey Instrument for AI-Enabled Learning Governance Constructs**

| Construct | Sample Item | Scale |
| --- | --- | --- |
| Privacy concern | I am concerned about how student learning data are collected, stored, and used in AI-enabled learner support. | 1–5 |
| Transparency perception | My institution clearly explains when and how AI is used in learner-support processes. | 1–5 |
| Human oversight expectation | Important learner-support decisions should be reviewed by teachers, advisors, or administrators. | 1–5 |

**Appendix B. Semi-Structured Interview Protocol**

| Area | Guiding Question |
| --- | --- |
| AI use | How are AI tools currently used in learning, advising, feedback, or student support in your institution? |
| Privacy | What concerns do you have about the collection or use of student data in AI-enabled systems? |
| Human oversight | Which AI-supported decisions should require human review? |
| Inclusion | How can AI-enabled learner support better serve students with diverse needs? |
| Governance | What institutional rules or safeguards are needed for responsible AI use? |
